# Supplementary material
Source: PubMed Central journal article supplement (PMC2804175)

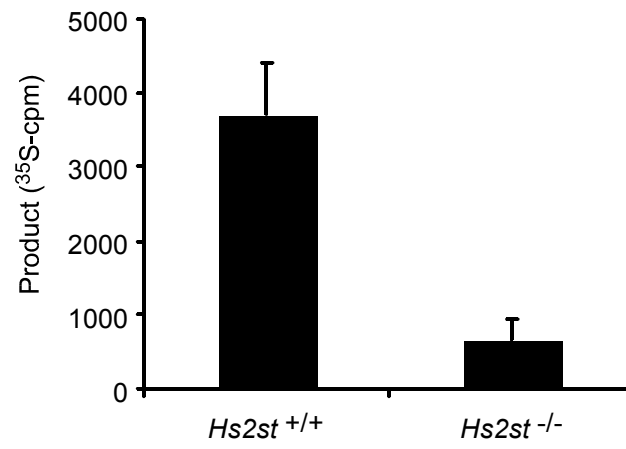

Supplement: supp_M109.063701_jbc.M109.063701-2.pdf [file supp_M109.063701_jbc.M109.063701-2.pdf]

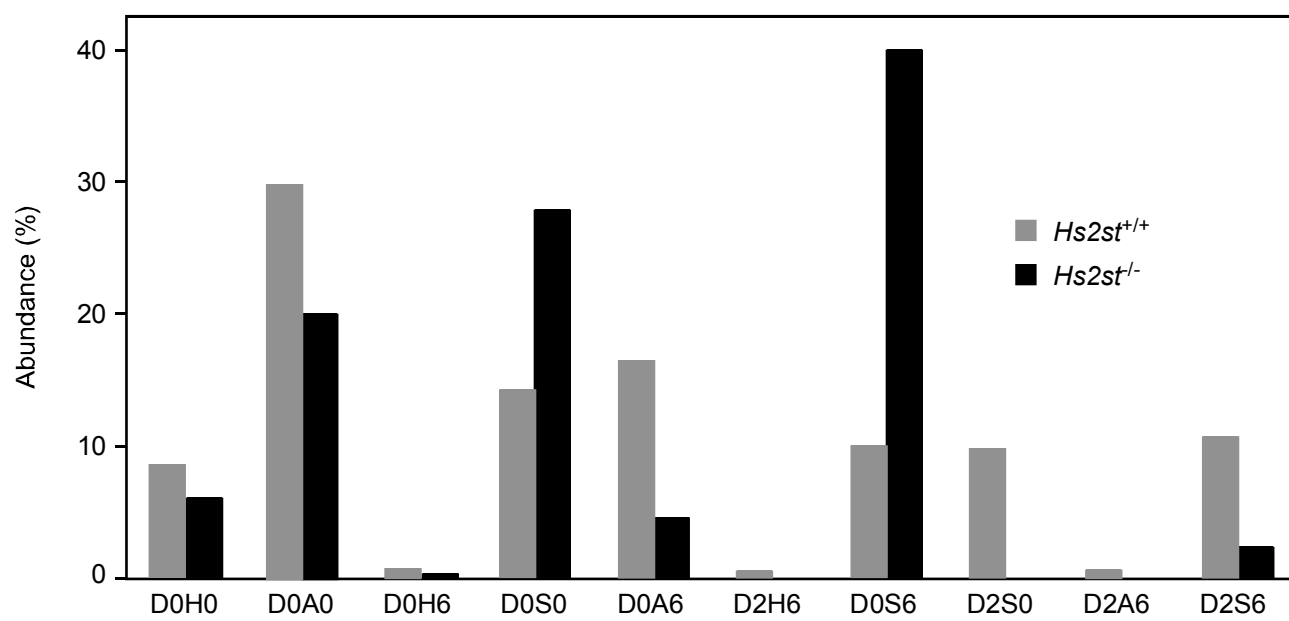

Supplement: supp_M109.063701_jbc.M109.063701-3.pdf [file supp_M109.063701_jbc.M109.063701-3.pdf]
